# Supplementary material for: Evolutionary and functional implications of hypervariable loci within the skin virome
Source: PeerJ journal article supplement (doi:10.7717/peerj.2959), 2017-02-07

$pN/pS$  Ratio

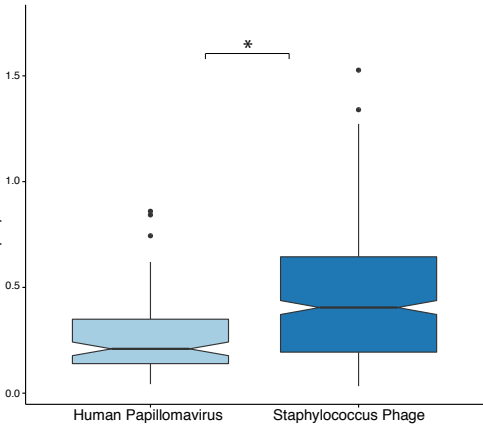

Supplement: FigureS2.pdf [file FigureS2.pdf]
