# Supplementary material for: Evolutionary and functional implications of hypervariable loci within the skin virome
Source: PeerJ. 2017 Feb 7;5:e2959. doi: 10.7717/peerj.2959 (PMC5299996; doi:10.7717/peerj.2959)
Supplement: Supplemental Information 1 — Pfam Domain Annotations of HPV Genes Associated with Hypervariable Loci. [file peerj-05-2959-s001.xls]

## Sheet: TableS1.txt
target_name	accession	tlen	query_name	accession	qlen	E-value	score	bias	#	of	c-Evalue	i-Evalue	score	bias	from	to	from	to	from	to	acc	description_of_target
Late_protein_L2	PF00513.14	525	2933_.orf00046_1	-	481	5e-106	355.7	5.8	1	1	3.8e-110	6.2e-106	355.4	5.8	25	525	1	476	1	476	0.84	Late_Protein_L2
PPV_E2_N	PF00508.13	200	2933_.orf00034_1	-	331	6.9e-46	156	2.2	1	1	1.2e-49	1e-45	155.4	2.2	77	199	2	124	1	125	0.98	E2_(early)_protein,_N_terminal
PPV_E2_C	PF00511.13	80	2933_.orf00034_1	-	331	1.9e-22	79.1	1	1	1	5e-26	4e-22	78	0.1	2	79	251	327	249	328	0.91	E2_(early)_protein,_C_terminal
PPV_E1_C	PF00519.13	432	2933_.orf00026_1	-	449	1.6e-183	610.3	10.5	1	1	2.3e-187	1.8e-183	610.1	10.5	1	431	13	439	13	440	0.98	Papillomavirus_helicase
Parvo_NS1	PF01057.13	272	2933_.orf00026_1	-	449	4.3e-11	42.3	0	1	1	1e-14	8.1e-11	41.4	0	55	212	213	372	157	414	0.78	Parvovirus_non-structural_protein_NS1
Late_protein_L1	PF00500.14	498	2933_.orf00008_1	-	178	1.2e-61	208.9	0.2	1	1	9e-66	1.5e-61	208.7	0.2	326	497	1	174	1	176	0.88	L1_(late)_protein
PPV_E1_C	PF00519.13	432	5817_.orf00055_1	-	464	5.1e-183	608.7	14	1	1	7.1e-187	5.8e-183	608.5	14	1	432	28	455	28	455	0.99	Papillomavirus_helicase
Parvo_NS1	PF01057.13	272	5817_.orf00055_1	-	464	7.1e-08	31.7	1	1	1	2.4e-11	2e-07	30.3	1	75	212	241	386	165	408	0.7	Parvovirus_non-structural_protein_NS1
Late_protein_L2	PF00513.14	525	5817_.orf00033_1	-	506	1.4e-110	370.7	0.1	1	1	9.8e-115	1.6e-110	370.5	0.1	1	524	3	502	3	503	0.81	Late_Protein_L2
Late_protein_L1	PF00500.14	498	5817_.orf00023_1	-	515	3.3e-219	728.7	0	1	1	2.3e-223	3.7e-219	728.5	0	1	498	4	513	4	515	0.93	L1_(late)_protein
Late_protein_L2	PF00513.14	525	6514_.orf00033_1	-	510	3.8e-128	428.6	3.8	1	1	2.7e-132	4.5e-128	428.4	3.8	2	525	6	506	5	506	0.85	Late_Protein_L2
Late_protein_L1	PF00500.14	498	8937_.orf00020_1	-	516	2.2e-227	755.7	0	1	1	1.5e-231	2.5e-227	755.5	0	1	497	4	513	4	515	0.96	L1_(late)_protein
PPV_E1_C	PF00519.13	432	8937_.orf00040_1	-	441	5.1e-185	615.3	13.8	1	1	7.4e-189	6e-185	615	13.8	1	432	5	432	5	432	0.98	Papillomavirus_helicase
Parvo_NS1	PF01057.13	272	8937_.orf00040_1	-	441	3.6e-06	26.1	0.1	1	1	1.5e-09	1.2e-05	24.4	0.1	75	209	227	364	182	368	0.78	Parvovirus_non-structural_protein_NS1
PPV_E2_N	PF00508.13	200	8937_.orf00047_1	-	406	3.1e-77	258.3	9	1	1	5.4e-81	4.4e-77	257.8	9	11	197	1	187	1	190	0.99	E2_(early)_protein,_N_terminal
PPV_E2_C	PF00511.13	80	8937_.orf00047_1	-	406	1.1e-25	89.4	0.2	1	1	3.8e-29	3e-25	88	0.2	1	78	325	401	325	403	0.96	E2_(early)_protein,_C_terminal
Late_protein_L2	PF00513.14	525	8937_.orf00005_1	-	514	1.6e-146	489.3	4.8	1	1	1.1e-150	1.8e-146	489.1	4.8	1	525	7	508	7	508	0.89	Late_Protein_L2
PPV_E1_C	PF00519.13	432	26962_.orf00024_1	-	373	3.2e-164	546.7	6.3	1	1	4.6e-168	3.7e-164	546.5	6.3	67	431	1	363	1	364	0.98	Papillomavirus_helicase
Parvo_NS1	PF01057.13	272	26962_.orf00024_1	-	373	2.8e-07	29.8	0.1	1	1	8.7e-11	7.1e-07	28.5	0.1	85	212	168	297	82	352	0.86	Parvovirus_non-structural_protein_NS1
Late_protein_L2	PF00513.14	525	32325_.orf00013_1	-	467	2.1e-139	465.8	13	1	1	1.4e-143	2.3e-139	465.6	13	51	525	1	464	1	464	0.91	Late_Protein_L2
Late_protein_L1	PF00500.14	498	32325_.orf00024_1	-	509	4.6e-242	804.1	0	1	1	3.2e-246	5.2e-242	803.9	0	1	498	5	508	5	509	0.96	L1_(late)_protein
PPV_E1_C	PF00519.13	432	32325_.orf00047_1	-	609	1.5e-206	686.2	0.6	1	1	3.3e-210	1.8e-206	686	0.6	1	432	172	600	172	600	0.99	Papillomavirus_helicase
PPV_E1_N	PF00524.14	121	32325_.orf00047_1	-	609	7.7e-30	103.7	4.1	1	1	2.8e-33	1.5e-29	102.7	4.1	1	119	1	118	1	120	0.88	E1_Protein,_N_terminal_domain
Parvo_NS1	PF01057.13	272	32325_.orf00047_1	-	609	7.6e-06	25.1	0	1	1	3.7e-09	2e-05	23.7	0	84	211	401	530	386	535	0.87	Parvovirus_non-structural_protein_NS1
PPV_E1_C	PF00519.13	432	35384_.orf00005_1	-	223	2.5e-101	339.5	1.5	1	1	3.6e-105	2.9e-101	339.3	1.5	214	432	1	214	1	214	0.98	Papillomavirus_helicase
Parvo_NS1	PF01057.13	272	35384_.orf00005_1	-	223	9.8e-06	24.7	0	1	1	2.5e-09	2.1e-05	23.6	0	83	212	19	150	8	157	0.84	Parvovirus_non-structural_protein_NS1
Late_protein_L2	PF00513.14	525	35384_.orf00023_1	-	451	3.3e-102	343	3.3	1	1	2.6e-106	4.2e-102	342.7	3.3	63	525	2	446	1	446	0.88	Late_Protein_L2
PPV_E1_C	PF00519.13	432	38335_.orf00029_1	-	606	7.7e-186	618	7.9	1	1	2.4e-189	1.3e-185	617.2	7.9	1	432	170	597	170	597	0.99	Papillomavirus_helicase
PPV_E1_N	PF00524.14	121	38335_.orf00029_1	-	606	3.7e-30	104.7	0.3	1	1	1.9e-33	1e-29	103.3	0.3	4	120	5	126	2	127	0.83	E1_Protein,_N_terminal_domain
Parvo_NS1	PF01057.13	272	38335_.orf00029_1	-	606	2.4e-10	39.8	0	1	1	9.1e-14	4.9e-10	38.8	0	86	212	401	529	337	582	0.8	Parvovirus_non-structural_protein_NS1
Late_protein_L1	PF00500.14	498	38335_.orf00007_1	-	536	5e-216	718.2	0	1	1	3.7e-220	6e-216	717.9	0	1	497	25	532	25	533	0.95	L1_(late)_protein
E6	PF00518.13	110	39403_.orf00047_1	-	170	3e-24	85.4	14.8	1	1	2.8e-28	4.5e-24	84.9	14.8	1	110	57	166	57	166	1	Early_Protein_(E6)
PPV_E1_C	PF00519.13	432	39403_.orf00038_1	-	496	2e-180	600.2	4.2	1	1	2.8e-184	2.3e-180	600	4.2	1	432	58	487	58	487	0.98	Papillomavirus_helicase
Parvo_NS1	PF01057.13	272	39403_.orf00038_1	-	496	1.7e-09	37.1	0.1	1	1	5.6e-13	4.5e-09	35.6	0	83	216	286	421	227	468	0.76	Parvovirus_non-structural_protein_NS1
PPV_E2_N	PF00508.13	200	39403_.orf00027_1	-	368	1.4e-66	223.5	1.7	1	1	2.2e-70	1.8e-66	223.2	1.7	16	198	1	183	1	185	0.99	E2_(early)_protein,_N_terminal
PPV_E2_C	PF00511.13	80	39403_.orf00027_1	-	368	3.4e-21	75.1	0.6	1	1	7.5e-25	6.1e-21	74.2	0	1	78	293	363	293	365	0.93	E2_(early)_protein,_C_terminal
Late_protein_L2	PF00513.14	525	39403_.orf00024_1	-	539	1.3e-96	324.6	13.1	1	1	1.6e-100	2.6e-96	323.6	13.1	1	525	5	534	5	535	0.78	Late_Protein_L2
Late_protein_L1	PF00500.14	498	39403_.orf00018_1	-	491	7.4e-202	671.4	0	1	1	5.3e-206	8.6e-202	671.2	0	25	498	1	488	1	488	0.96	L1_(late)_protein
PPV_E1_C	PF00519.13	432	41366_.orf00005_1	-	242	1.1e-118	396.7	3	1	1	1.5e-122	1.2e-118	396.5	3	200	432	1	233	1	233	1	Papillomavirus_helicase
Parvo_NS1	PF01057.13	272	41366_.orf00005_1	-	242	5.4e-07	28.8	0	1	1	1.5e-10	1.2e-06	27.6	0	84	212	34	164	29	171	0.81	Parvovirus_non-structural_protein_NS1
PPV_E2_N	PF00508.13	200	41366_.orf00009_1	-	444	6.9e-75	250.6	1.1	1	1	1.1e-78	9e-75	250.3	1.1	16	199	1	183	1	184	0.99	E2_(early)_protein,_N_terminal
PPV_E2_C	PF00511.13	80	41366_.orf00009_1	-	444	9e-26	89.7	0.1	1	1	2.6e-29	2.1e-25	88.6	0.1	1	79	362	440	362	441	0.97	E2_(early)_protein,_C_terminal
Late_protein_L1	PF00500.14	498	41366_.orf00026_1	-	507	8.5e-234	776.8	0	1	1	5.9e-238	9.5e-234	776.6	0	1	497	4	505	4	507	0.96	L1_(late)_protein
PPV_E2_N	PF00508.13	200	44004_.orf00045_1	-	374	2.7e-65	219.3	0.5	1	1	4.4e-69	3.6e-65	218.9	0.5	16	199	1	185	1	186	0.98	E2_(early)_protein,_N_terminal
PPV_E2_C	PF00511.13	80	44004_.orf00045_1	-	374	1e-26	92.8	0.3	1	1	3.3e-30	2.7e-26	91.4	0.3	1	77	293	368	293	371	0.95	E2_(early)_protein,_C_terminal
PPV_E1_C	PF00519.13	432	44004_.orf00039_1	-	464	1.4e-185	617.2	8.4	1	1	1.9e-189	1.5e-185	617	8.4	2	432	28	455	27	455	0.99	Papillomavirus_helicase
Parvo_NS1	PF01057.13	272	44004_.orf00039_1	-	464	6.2e-06	25.4	0	1	1	2.2e-09	1.8e-05	23.8	0	103	212	274	386	246	439	0.83	Parvovirus_non-structural_protein_NS1
Late_protein_L1	PF00500.14	498	44004_.orf00015_1	-	507	2.8e-218	725.6	0	1	1	2.1e-222	3.4e-218	725.4	0	1	498	4	505	4	505	0.96	L1_(late)_protein
Late_protein_L2	PF00513.14	525	59283_.orf00011_1	-	539	1.6e-95	321	13.1	1	1	1.8e-99	2.9e-95	320.1	13.1	1	525	5	534	5	535	0.76	Late_Protein_L2
Late_protein_L1	PF00500.14	498	59283_.orf00025_1	-	320	1.4e-119	400	0	1	1	1e-123	1.7e-119	399.8	0	196	498	1	317	1	317	0.95	L1_(late)_protein
E6	PF00518.13	110	59283_.orf00031_1	-	140	2.1e-24	85.9	13.8	1	1	1.7e-28	2.7e-24	85.6	13.8	1	110	27	136	27	136	1	Early_Protein_(E6)
