# Supplementary material for: Evolutionary and functional implications of hypervariable loci within the skin virome
Source: PeerJ. 2017 Feb 7;5:e2959. doi: 10.7717/peerj.2959 (PMC5299996; doi:10.7717/peerj.2959)
Supplement: Supplemental Information 2 — Pfam Domain Annotations of Staphylococcus Phage Genes Associated with Hypervariable Loci. [file peerj-05-2959-s002.xls]

## Sheet: TableS2.txt
target_name	accession	tlen	query_name	accession	qlen	E-value	score	bias	#	of	c-Evalue	i-Evalue	score	bias	from	to	from	to	from	to	acc	description_of_target
DUF955	PF06114.9	123	120_.orf00005_1	-	156	2.5e-09	37	0.2	1	1	1.8e-13	3e-09	36.7	0.2	26	120	28	123	6	126	0.88	Domain_of_unknown_function_(DUF955)
DUF5067	PF16729.1	129	2120_.orf00008_1	-	221	1.8e-17	63.6	1.9	1	1	1.1e-21	1.8e-17	63.6	1.9	63	129	1	69	1	69	0.96	Domain_of_unknown_function_(DUF5067)
ORF6C	PF10552.5	114	2855_.orf00084_1	-	118	6.4e-07	29.3	0.3	1	1	6.2e-11	1e-06	28.7	0.3	27	104	5	85	1	91	0.79	ORF6C_domain
Phage_rep_org_N	PF09681.6	121	2855_.orf00130_1	-	271	6.7e-44	148.5	1.1	1	1	8.3e-48	6.7e-44	148.5	1.1	1	121	6	125	6	125	0.99	N-terminal_phage_replisome_organiser_(Phage_rep_org_N)
DnaB_2	PF07261.7	74	2855_.orf00130_1	-	271	1.6e-12	46.8	0.7	1	1	6.7e-16	5.5e-12	45.1	0.3	9	72	188	251	176	252	0.91	Replication_initiation_and_membrane_attachment
CHAP	PF05257.12	83	2855_.orf00009_1	-	440	3.9e-08	33.6	1	1	1	2.4e-12	3.9e-08	33.6	1	4	83	105	194	101	194	0.78	CHAP_domain
Phage_integrase	PF00589.18	172	2855_.orf00042_1	-	351	1.7e-21	76.6	3.9	1	1	2.1e-25	1.7e-21	76.6	3.9	4	171	171	334	168	335	0.86	Phage_integrase_family
Integrase_AP2	PF14657.2	46	2855_.orf00042_1	-	351	2.9e-07	30	4.1	1	1	1.7e-10	1.3e-06	27.9	2.5	1	44	7	44	7	46	0.86	AP2-like_DNA-binding_integrase_domain
Peptidase_S24	PF00717.19	70	2855_.orf00060_1	-	206	8.4e-15	54.3	2.1	1	1	5.1e-18	1.7e-14	53.4	2.1	1	67	120	188	120	191	0.93	Peptidase_S24-like
HTH_19	PF12844.3	64	2855_.orf00060_1	-	206	6.9e-14	51.7	0.1	1	1	3.4e-17	1.1e-13	51.1	0.1	1	63	7	69	7	70	0.97	Helix-turn-helix_domain
HTH_3	PF01381.18	55	2855_.orf00060_1	-	206	6.9e-12	45.1	0	1	1	3.5e-15	1.1e-11	44.4	0	1	55	10	64	10	64	0.98	Helix-turn-helix
HTH_26	PF13443.2	63	2855_.orf00060_1	-	206	2.1e-08	34.4	0	1	1	1.2e-11	4e-08	33.4	0	1	58	9	65	9	69	0.97	Cro/C1-type_HTH_DNA-binding_domain
HTH_31	PF13560.2	64	2855_.orf00060_1	-	206	7.3e-08	32.5	0	1	1	5.4e-11	1.7e-07	31.3	0	2	60	6	63	5	66	0.95	Helix-turn-helix_domain
DUF3102	PF11300.4	129	2855_.orf00076_1	-	271	3e-05	24.1	4.3	1	1	2.7e-09	4.4e-05	23.6	1.7	39	77	6	43	2	130	0.83	Protein_of_unknown_function_(DUF3102)
DUF3269	PF11673.4	73	3302_.orf00008_1	-	72	5.4e-18	65	0.1	1	1	3.6e-22	5.8e-18	64.9	0.1	4	73	3	72	1	72	0.97	Protein_of_unknown_function_(DUF3269)
Sipho_tail	PF05709.7	255	5753_.orf00052_1	-	428	5.4e-33	114.4	4.2	1	1	4.1e-37	6.7e-33	114.1	4.2	52	253	4	426	2	428	0.98	Phage_tail_protein
Peptidase_M23	PF01551.18	96	5753_.orf00034_1	-	1888	1.1e-20	73.5	0.1	1	1	2.7e-24	4.4e-20	71.6	0.1	2	96	1533	1625	1532	1625	0.95	Peptidase_family_M23
Peptidase_S24	PF00717.19	70	6425_.orf00032_1	-	203	1.3e-12	47.3	1.6	1	1	1.6e-16	1.3e-12	47.3	1.6	1	66	117	184	117	188	0.9	Peptidase_S24-like
HTH_3	PF01381.18	55	6425_.orf00032_1	-	203	3.3e-06	26.9	0.1	1	1	8.2e-10	6.7e-06	25.9	0.1	1	55	7	62	7	62	0.94	Helix-turn-helix
Bro-N	PF02498.13	87	6425_.orf00024_1	-	265	1.6e-30	105.3	0	1	1	5e-34	4.1e-30	104	0	2	87	41	126	40	126	0.91	BRO_family,_N-terminal_domain
ORF6C	PF10552.5	114	6425_.orf00024_1	-	265	9.4e-22	77.1	1.4	1	1	2.6e-25	2.1e-21	76	1.4	1	112	143	252	143	254	0.97	ORF6C_domain
Minor_capsid_3	PF12691.3	132	8899_.orf00011_1	-	117	4.7e-06	26.9	0.4	1	1	4.1e-10	6.6e-06	26.5	0.4	26	131	8	112	2	113	0.83	Minor_capsid_protein_from_bacteriophage
RecT	PF03837.10	199	8899_.orf00187_1	-	266	1.3e-51	174.9	0.1	1	1	1.1e-55	1.8e-51	174.4	0.1	1	189	53	246	53	259	0.9	RecT_family
Peptidase_M23	PF01551.18	96	8899_.orf00051_1	-	1862	5.4e-20	71.3	1.4	1	1	1.3e-23	1e-19	70.4	0.2	2	96	1527	1619	1526	1619	0.95	Peptidase_family_M23
SLT	PF01464.16	117	8899_.orf00051_1	-	1862	1.6e-05	24.4	0.2	1	1	8.3e-09	6.7e-05	22.4	0	21	82	1664	1730	1659	1753	0.89	Transglycosylase_SLT_domain
Sipho_tail	PF05709.7	255	8899_.orf00057_1	-	491	1.1e-46	159.3	6.2	1	1	8.2e-51	1.3e-46	159	6.2	12	255	26	491	17	491	0.98	Phage_tail_protein
Amidase_2	PF01510.21	99	8899_.orf00121_1	-	574	1.3e-12	48.1	0.3	1	1	6.1e-16	5e-12	46.3	0.3	3	99	31	165	29	165	0.9	N-acetylmuramoyl-L-alanine_amidase
CHAP	PF05257.12	83	8899_.orf00121_1	-	574	1.6e-07	31.6	2	1	1	2e-11	1.6e-07	31.6	2	5	83	238	327	234	327	0.74	CHAP_domain
dUTPase	PF00692.15	129	12490_.orf00003_1	-	140	1.4e-27	95.7	0	1	1	1e-31	1.6e-27	95.6	0	2	125	12	137	11	139	0.94	dUTPase
RusA	PF05866.7	124	15416_.orf00008_1	-	103	4.3e-24	85.3	0.8	1	1	3.1e-28	5e-24	85.1	0.8	32	124	8	100	3	100	0.95	Endodeoxyribonuclease_RusA
DUF3310	PF11753.4	60	15416_.orf00020_1	-	134	1.6e-22	79.2	0.4	1	1	1.5e-26	2.5e-22	78.6	0.4	1	60	67	126	67	126	0.93	Protein_of_unknwon_function_(DUF3310)
Phage_prot_Gp6	PF05133.10	419	15812_.orf00027_1	-	440	2.2e-114	382.7	21.2	1	1	1.6e-118	2.5e-114	382.5	21.2	13	418	2	411	1	412	0.98	Phage_portal_protein,_SPP1_Gp6-like
Terminase_3	PF04466.9	389	15812_.orf00014_1	-	433	6.9e-114	380.9	7.1	1	1	1e-117	8.1e-114	380.6	7.1	3	389	30	410	28	410	0.97	Phage_terminase_large_subunit
Terminase_6	PF03237.11	382	15812_.orf00014_1	-	433	2.8e-08	32.9	5.6	1	1	6.7e-12	5.4e-08	31.9	5.6	61	380	93	409	36	411	0.76	Terminase-like_family
RecT	PF03837.10	199	16992_.orf00010_1	-	311	1e-48	165.4	4.7	1	1	6.3e-53	1e-48	165.4	4.7	2	196	51	252	50	266	0.9	RecT_family
Phage_capsid	PF05065.9	276	17428_.orf00015_1	-	334	1.1e-10	41.2	0.1	1	1	8.2e-15	1.3e-10	40.9	0.1	4	150	37	192	35	293	0.8	Phage_capsid_family
HK97-gp10_like	PF04883.8	81	17428_.orf00028_1	-	140	7.2e-05	23.6	0.3	1	1	6.9e-09	0.00011	22.9	0	1	46	15	61	15	100	0.84	Bacteriophage_HK97-gp10,_putative_tail-component
Phage_XkdX	PF09693.6	40	22644_.orf00006_1	-	48	1.4e-10	40.9	0.6	1	1	1e-14	1.6e-10	40.6	0.6	6	40	7	41	7	41	0.99	Phage_uncharacterised_protein_(Phage_XkdX)
Peptidase_M23	PF01551.18	96	23174_.orf00007_1	-	561	1.6e-24	85.8	0.2	1	1	1.8e-28	2.9e-24	85	0.2	2	92	190	283	189	294	0.9	Peptidase_family_M23
DUF955	PF06114.9	123	23194_.orf00071_1	-	154	1.8e-07	31	0.2	1	1	1.4e-11	2.3e-07	30.7	0.2	28	118	32	118	12	123	0.91	Domain_of_unknown_function_(DUF955)
ORF6C	PF10552.5	114	23194_.orf00090_1	-	166	1.1e-09	38.2	12.7	1	1	2.9e-13	4.8e-09	36.2	9.4	9	103	36	139	28	144	0.8	ORF6C_domain
DUF1071	PF06378.7	148	23194_.orf00103_1	-	206	4.9e-39	133.1	0.1	1	1	4.3e-43	7e-39	132.6	0.1	2	128	6	142	5	163	0.87	Protein_of_unknown_function_(DUF1071)
SSB	PF00436.21	104	23194_.orf00106_1	-	134	8.6e-34	115.6	2.9	1	1	6.7e-38	1.1e-33	115.2	2.9	1	104	2	101	2	101	0.97	Single-strand_binding_protein_family
Phage_XkdX	PF09693.6	40	23194_.orf00005_1	-	163	1.9e-08	34	1.2	1	1	2.9e-12	4.7e-08	32.8	1.2	2	40	119	157	118	157	0.98	Phage_uncharacterised_protein_(Phage_XkdX)
GDPD	PF03009.13	259	23194_.orf00024_1	-	728	1.2e-51	175.9	0.7	1	1	3.3e-55	1.8e-51	175.3	0.7	1	258	504	724	504	725	0.95	Glycerophosphoryl_diester_phosphodiesterase_family
DUF2479	PF10651.5	170	23194_.orf00024_1	-	728	6.8e-43	146.2	3.6	1	1	1.3e-46	6.8e-43	146.2	3.6	1	168	1	175	1	177	0.96	Domain_of_unknown_function_(DUF2479)
Collagen	PF01391.14	60	23194_.orf00024_1	-	728	1.3e-14	53.5	59.9	1	2	9.6e-13	5.2e-09	35.6	25.6	4	55	180	231	178	232	0.6	Collagen_triple_helix_repeat_(20_copies)
Collagen	PF01391.14	60	23194_.orf00024_1	-	728	1.3e-14	53.5	59.9	2	2	8.3e-12	4.5e-08	32.6	26.2	1	50	198	247	197	251	0.49	Collagen_triple_helix_repeat_(20_copies)
Phage_holin_1	PF04531.9	82	23194_.orf00026_1	-	169	2e-26	92.2	0.2	1	1	1.9e-30	3.1e-26	91.6	0.2	1	82	13	92	13	92	0.99	Bacteriophage_holin
Amidase_3	PF01520.14	175	23194_.orf00039_1	-	472	1.6e-32	112.9	0.5	1	1	4.8e-36	2.6e-32	112.2	0.5	1	174	169	351	169	352	0.94	N-acetylmuramoyl-L-alanine_amidase
SH3_5	PF08460.6	65	23194_.orf00039_1	-	472	4.8e-14	52	1.2	1	1	3e-17	1.6e-13	50.4	1.2	4	65	391	455	389	455	0.96	Bacterial_SH3_domain
CHAP	PF05257.12	83	23194_.orf00039_1	-	472	2.2e-12	47.2	1.8	1	1	4.1e-16	2.2e-12	47.2	1.8	3	83	22	112	20	112	0.79	CHAP_domain
Phage_integrase	PF00589.18	172	23194_.orf00061_1	-	352	6.6e-21	74.7	1.1	1	1	1.2e-24	6.6e-21	74.7	1.1	5	170	167	336	162	338	0.82	Phage_integrase_family
Integrase_AP2	PF14657.2	46	23194_.orf00061_1	-	352	3.5e-15	55.3	4.3	1	1	2.5e-18	1.4e-14	53.5	4.3	1	45	11	54	11	55	0.97	AP2-like_DNA-binding_integrase_domain
Phage_int_SAM_3	PF14659.2	58	23194_.orf00061_1	-	352	1.8e-12	47.2	3.6	1	1	3.4e-16	1.8e-12	47.2	3.6	1	58	59	114	59	114	0.98	Phage_integrase,_N-terminal_SAM-like_domain
Terminase_6	PF03237.11	382	26398_.orf00083_1	-	461	6.2e-45	153.5	0	1	1	4.5e-49	7.2e-45	153.3	0	2	381	59	446	58	447	0.89	Terminase-like_family
ADPrib_exo_Tox	PF03496.10	190	26398_.orf00107_1	-	215	1.2e-25	89.9	2.9	1	1	1.6e-29	1.3e-25	89.8	2.1	11	184	42	210	33	214	0.86	ADP-ribosyltransferase_exoenzyme
Phage_GP20	PF06810.7	149	26398_.orf00123_1	-	193	8.3e-26	90.4	21.2	1	1	7.2e-30	1.2e-25	90	21.2	12	141	12	143	2	151	0.91	Phage_minor_structural_protein_GP20
Phage_cap_E	PF03864.11	333	26398_.orf00137_1	-	362	1.1e-15	57.5	0.3	1	1	8.5e-20	1.4e-15	57.2	0.3	21	330	31	332	8	334	0.86	Phage_major_capsid_protein_E
PTPS	PF01242.15	123	26398_.orf00061_1	-	166	3.6e-27	94.6	0.6	1	1	3.3e-31	5.4e-27	94.1	0.4	2	122	17	134	16	135	0.91	6-pyruvoyl_tetrahydropterin_synthase
RecU	PF03838.10	160	26398_.orf00028_1	-	98	9.6e-17	61.3	0.4	1	1	6.4e-21	1e-16	61.2	0.4	73	158	2	89	1	91	0.92	Recombination_protein_U
SH3_5	PF08460.6	65	32448_.orf00007_1	-	476	9.4e-19	67.1	1.7	1	1	1.7e-22	9.4e-19	67.1	1.7	1	65	390	455	390	455	0.98	Bacterial_SH3_domain
CHAP	PF05257.12	83	32448_.orf00007_1	-	476	5.5e-11	42.8	3.1	1	1	1e-14	5.5e-11	42.8	3.1	6	83	26	117	20	117	0.67	CHAP_domain
Amidase_2	PF01510.21	99	32448_.orf00007_1	-	476	3.8e-09	37	0.1	1	1	1.5e-12	8e-09	36	0.1	3	98	193	318	191	319	0.79	N-acetylmuramoyl-L-alanine_amidase
dUTPase_2	PF08761.7	166	33108_.orf00010_1	-	172	7e-17	62	4.6	1	1	6e-21	9.7e-17	61.5	4.6	1	163	8	162	8	164	0.8	dUTPase
DUF1071	PF06378.7	148	38562_.orf00017_1	-	207	5.9e-38	129.6	0.2	1	1	5.4e-42	8.8e-38	129.1	0.2	2	129	10	148	9	169	0.81	Protein_of_unknown_function_(DUF1071)
HNHc_6	PF16784.1	200	41120_.orf00027_1	-	180	8e-70	234.3	1.2	1	1	5.5e-74	9e-70	234.2	1.2	25	199	2	176	1	177	0.99	Putative_HNHc_nuclease
DnaB_C	PF03796.11	250	41120_.orf00042_1	-	380	5.3e-70	235.5	0.7	1	1	9.7e-74	5.3e-70	235.5	0.7	2	248	128	378	127	380	0.95	DnaB-like_helicase_C_terminal_domain
AAA_25	PF13481.2	194	41120_.orf00042_1	-	380	6.7e-09	35.5	0	1	1	2.8e-12	1.5e-08	34.3	0	10	188	123	300	114	305	0.75	AAA_domain
HTH_3	PF01381.18	55	42642_.orf00014_1	-	156	4.7e-10	39.2	0.2	1	1	3.9e-13	1.1e-09	38.1	0	1	55	58	112	58	112	0.97	Helix-turn-helix
HTH_19	PF12844.3	64	42642_.orf00014_1	-	156	6.8e-09	35.7	0.1	1	1	6.5e-12	1.8e-08	34.4	0.1	4	61	58	115	57	118	0.93	Helix-turn-helix_domain
HTH_IclR	PF09339.6	52	42642_.orf00014_1	-	156	2.2e-06	27.2	0.1	1	1	1.7e-09	4.5e-06	26.2	0	16	40	64	88	54	89	0.92	IclR_helix-turn-helix_domain
HTH_26	PF13443.2	63	42642_.orf00014_1	-	156	3.5e-05	24	0	1	1	2.4e-08	6.6e-05	23.1	0	3	60	59	115	58	117	0.92	Cro/C1-type_HTH_DNA-binding_domain
HTH_5	PF01022.16	47	42642_.orf00014_1	-	156	4.9e-05	23	0.1	1	1	4.5e-08	0.00012	21.7	0	11	37	62	88	57	92	0.93	Bacterial_regulatory_protein,_arsR_family
HTH_24	PF13412.2	48	42642_.orf00014_1	-	156	6.6e-05	22.2	1.2	1	1	2.9e-08	7.8e-05	22	0.1	8	39	57	88	52	88	0.91	Winged_helix-turn-helix_DNA-binding
YolD	PF08863.6	94	44042_.orf00011_1	-	136	4.6e-24	84	3.6	1	1	3.5e-28	5.6e-24	83.8	3.6	1	94	44	136	44	136	0.98	YolD-like_protein
dUTPase	PF00692.15	129	46940_.orf00087_1	-	141	8.7e-29	99.7	0	1	1	6.2e-33	1e-28	99.5	0	2	125	13	138	12	140	0.97	dUTPase
IstB_IS21	PF01695.13	178	46940_.orf00022_1	-	256	1.7e-17	63.6	0.1	1	1	3.2e-21	2.6e-17	63	0.1	43	150	111	219	65	233	0.75	IstB-like_ATP_binding_protein
Bac_DnaA	PF00308.14	219	46940_.orf00022_1	-	256	4.3e-07	29.9	0.5	1	1	7.6e-11	6.2e-07	29.3	0.5	14	156	92	237	82	250	0.74	Bacterial_dnaA__protein
ANT	PF03374.10	108	46940_.orf00051_1	-	269	3.3e-31	107.7	0	1	1	6.9e-35	5.6e-31	106.9	0	4	106	150	257	148	259	0.95	Phage_antirepressor_protein_KilAC_domain
AntA	PF08346.8	68	46940_.orf00051_1	-	269	2.7e-21	75.8	0.1	1	1	8.3e-25	6.7e-21	74.5	0.1	1	68	20	90	20	90	0.88	AntA/AntB_antirepressor
Peptidase_G2	PF11962.4	223	48053_.orf00008_1	-	324	3.1e-56	190.2	0.8	1	1	2.6e-60	4.2e-56	189.8	0.8	2	221	95	320	94	321	0.93	Peptidase_G2,_IMC_autoproteolytic_cleavage_domain
DUF1514	PF07438.7	66	48118_.orf00016_1	-	49	7.1e-07	29.1	1.8	1	1	4.8e-11	7.7e-07	29	1.8	1	41	1	41	1	47	0.89	Protein_of_unknown_function_(DUF1514)
HTH_19	PF12844.3	64	50858_.orf00003_1	-	92	3.3e-14	52.8	0.3	1	1	1.3e-17	5.3e-14	52.1	0.3	1	61	23	83	23	86	0.96	Helix-turn-helix_domain
HTH_3	PF01381.18	55	50858_.orf00003_1	-	92	2.4e-13	49.8	0.2	1	1	9.2e-17	3.7e-13	49.2	0.2	1	55	26	80	26	80	0.98	Helix-turn-helix
HTH_31	PF13560.2	64	50858_.orf00003_1	-	92	8.4e-09	35.5	0.3	1	1	7.9e-12	3.2e-08	33.7	0	2	42	22	61	21	81	0.8	Helix-turn-helix_domain
HTH_37	PF13744.2	80	50858_.orf00003_1	-	92	1.4e-06	28	0.1	1	1	4.3e-10	1.7e-06	27.7	0.1	23	75	26	77	9	82	0.82	Helix-turn-helix_domain
SSB	PF00436.21	104	52967_.orf00038_1	-	130	4e-23	81.3	0	1	1	3.7e-27	6.1e-23	80.7	0	2	104	3	98	2	98	0.96	Single-strand_binding_protein_family
NUMOD4	PF07463.7	49	52967_.orf00041_1	-	180	1.8e-13	50.3	3.7	1	1	4.7e-17	3.8e-13	49.3	3.7	1	49	3	60	3	60	0.96	NUMOD4_motif
HNH_3	PF13392.2	46	52967_.orf00041_1	-	180	2.4e-13	49.4	1.5	1	1	5.8e-17	4.7e-13	48.5	1.5	2	45	69	112	68	113	0.95	HNH_endonuclease
HNHc_6	PF16784.1	200	52967_.orf00045_1	-	194	4e-71	238.6	0.8	1	1	2.7e-75	4.5e-71	238.4	0.8	11	199	1	190	1	191	0.99	Putative_HNHc_nuclease
Phage_pRha	PF09669.6	88	52967_.orf00015_1	-	255	1.7e-25	89.3	0.1	1	1	1e-29	1.7e-25	89.3	0.1	1	87	15	102	15	103	0.9	Phage_regulatory_protein_Rha_(Phage_pRha)
DUF559	PF04480.8	109	53274_.orf00008_1	-	260	4.2e-10	39.3	0.3	1	1	7.3e-14	1.2e-09	37.9	0.3	31	106	148	229	138	232	0.86	Protein_of_unknown_function_(DUF559)
PVL_ORF50	PF07768.7	116	53274_.orf00038_1	-	121	1.1e-19	70.7	7.4	1	1	8.1e-24	1.3e-19	70.5	7.4	2	112	4	116	3	119	0.92	PVL_ORF-50-like_family
RinB	PF06116.8	51	53274_.orf00013_1	-	52	2.4e-10	40.2	0.1	1	1	2e-14	3.2e-10	39.8	0.1	1	49	3	47	3	49	0.95	Transcriptional_activator_RinB
DnaB_C	PF03796.11	250	53274_.orf00058_1	-	304	1.8e-73	246.9	0.3	1	1	2.8e-77	2.3e-73	246.5	0.3	2	248	48	302	48	304	0.94	DnaB-like_helicase_C_terminal_domain
AAA_25	PF13481.2	194	53274_.orf00058_1	-	304	5e-09	35.9	0	1	1	9.2e-13	7.5e-09	35.4	0	13	186	46	220	36	226	0.82	AAA_domain
DUF2829	PF11195.4	72	53969_.orf00003_1	-	106	5.3e-06	26.4	0.9	1	1	5.1e-10	8.2e-06	25.8	0.9	10	72	26	105	20	105	0.73	Protein_of_unknown_function_(DUF2829)
Bro-N	PF02498.13	87	54580_.orf00012_1	-	238	1.3e-30	105.6	0	1	1	3.9e-34	3.2e-30	104.3	0	2	87	14	99	13	99	0.92	BRO_family,_N-terminal_domain
ORF6C	PF10552.5	114	54580_.orf00012_1	-	238	3e-22	78.7	1.2	1	1	3.8e-26	3e-22	78.7	1.2	1	111	116	224	116	227	0.97	ORF6C_domain
Holin_SPP1	PF04688.9	74	55642_.orf00025_1	-	89	6.5e-17	61.3	0.6	1	1	5.1e-21	8.2e-17	61	0.6	3	73	4	70	2	71	0.92	SPP1_phage_holin
Peptidase_S24	PF00717.19	70	56417_.orf00014_1	-	217	2.1e-13	49.8	0.4	1	1	4.5e-17	3.7e-13	49.1	0.4	1	66	139	202	139	206	0.94	Peptidase_S24-like
HTH_3	PF01381.18	55	56417_.orf00014_1	-	217	1.4e-10	40.9	0	1	1	2.8e-14	2.3e-10	40.3	0	10	51	1	42	1	46	0.95	Helix-turn-helix
HTH_3	PF01381.18	55	56417_.orf00017_1	-	108	2.4e-10	40.2	0	1	1	4.1e-14	3.3e-10	39.7	0	1	54	23	76	23	77	0.97	Helix-turn-helix
HTH_19	PF12844.3	64	56417_.orf00017_1	-	108	3.2e-09	36.8	0.4	1	1	6.1e-13	4.9e-09	36.2	0.4	3	62	22	81	21	83	0.96	Helix-turn-helix_domain
HNHc_6	PF16784.1	200	60431_.orf00004_1	-	180	8.1e-77	257.2	4.4	1	1	5.6e-81	9e-77	257	4.4	24	200	1	177	1	177	0.99	Putative_HNHc_nuclease
ORF6C	PF10552.5	114	62555_.orf00015_1	-	186	1.5e-10	41	2.2	1	1	9e-15	1.5e-10	41	2.2	16	105	57	149	41	156	0.84	ORF6C_domain
PVL_ORF50	PF07768.7	116	65191_.orf00004_1	-	101	1.4e-16	60.7	4.3	1	1	9.6e-21	1.6e-16	60.5	4.3	20	112	2	96	1	99	0.89	PVL_ORF-50-like_family
DUF3102	PF11300.4	129	69054_.orf00017_1	-	308	2.3e-10	40.7	4.2	1	1	4.3e-14	7e-10	39.1	2.2	15	111	18	103	5	167	0.8	Protein_of_unknown_function_(DUF3102)
DUF1071	PF06378.7	148	72953_.orf00019_1	-	208	5.1e-38	129.8	0.1	1	1	4.4e-42	7.1e-38	129.4	0.1	2	128	10	147	9	171	0.82	Protein_of_unknown_function_(DUF1071)
dUTPase	PF00692.15	129	73209_.orf00005_1	-	140	2.4e-26	91.8	0.1	1	1	1.7e-30	2.8e-26	91.6	0.1	2	125	12	137	11	139	0.96	dUTPase
DUF3310	PF11753.4	60	73209_.orf00015_1	-	150	2.5e-16	59.4	0.2	1	1	2.9e-20	4.7e-16	58.5	0.2	1	59	80	139	80	140	0.98	Protein_of_unknwon_function_(DUF3310)
